# Supplementary material for: Differential Expression of Six Rnase2 and Three Rnase3 Paralogs Identified in Blunt Snout Bream in Response to Aeromonas hydrophila Infection
Source: PubMed Central journal article supplement (PMC5852591; doi:10.3390/genes9020095), 2018-02-14
Supplement: genes-09-00095-s001.pdf [file genes-09-00095-s001.pdf]

## Supplementary Materials:

### >*Rnase2a*

ATGGAGATTCATCAGTCTGCTGTGATTCTGCTGCTGATCTTGATTGTTCC  
ATCCTTCACTCATGGTCAACCACCAGACCAAATAATGCACAGCTATATAA  
AATTCCTCAATCAGCATTAGGTCCTGATATGACTGAGCAGAAGTGTGAC  
AGTCAAATGAGAAAGAGAGGCATCACTGTAAATGATAATGGCTGCAAACC  
TGTCAACACCTTCATACAAGCAAATTCAAATCAGATTAAAGCTGTTTGTG  
GCAATGGAGGAATTCCACATGGCAATAACTTGTTTAGGAGCATTACGCCT  
TTTCCAGTGATCACATGCACATTAATAATGTGGAGTGAGATATCCAAGATG  
TGAATATGGTAAAGGGAAGAAGTCCACTCGTTACATTGTGTTGAAGTGTG  
TTGAAGGCTGGCCTGTACATTATGACGAAGGCATAATTAAGCTGGTGGC  
CTATTTAGCTGGCTTTAA

### >*Rnase2b*

ATGGAGATTCATCAGTCTGCTGTGATTCTGCTGCTGATCTTGAGTGTTTC  
ATCCTTCACTCATGGACAACCAGACAATATAAAGCCCCGCTATATAAAAT  
TCCTCAATCAGCATTTCGGTCCTGATATGACTGAGCAGAAGTGTACCAGT  
GAAATCAGACAGAGAGATATCACTGGAAATGATGATGGCTGCAAACCTGT  
CAACACCTTCATACAAGCGAATTCAAATGATATCAGAGCAGTTTGTGGCA  
CAGGAGGAACTCCACAGGGAGGGGACCTGTTAAGAGCAACCAGCCTTTT  
CCGGTGATCACATGCAATTTACAAAGTGGGCAGAGACCCCAAGATGTGA  
ATATGGTAAAGGGAAGAAGTCCACTCGTTACATTGTGTTGGGGTGTGCAG  
AAGGCTGGCCTGTACATTATGAAGAAGGCATACCTGATACAAAGAAGACA  
GGCTGA

### >*Rnase2c*

ATGGAGATTCATCAGTCTGCTGTGATTCTGCTGCTGATCTTGAGTGTTTC  
ATCCTTCACTCACGGACAACCACCAGCACATATAAAGCCCCGCTATGAAA  
AATTCCTCAAACAGCATTACAATCCTGATATGACCGTGCAGAAGTGTGAC  
ACTGTAATTCGTGGAAATAGAGATTTTATTACAGTGAAACTGAAAATGG  
CTGCAAAAAAATCAACACCTTCATAAAAGCAAATTCAAATGATATTAAG  
CAGTTTGTGGAAAAGCAGGAAAACCGTACCGCAATATGGTTGCGAGCACC  
AAGCCTTTTTCTGTGGTCACCTGCAAATTACACAGCGGGGATACACACCC  
AAACTGTAAATACAGAGGGTCCAGGACACTCGTTATATAGTGTGGCGT  
GTGAACATGGCTGGCCTGTACATTATGATGAAGGCATATATAAGCCTAAT  
GGAAGCTAA

### >*Rnase2d*

ATGGAGATTCATCAGTCTGCTGTGATTCTGCTGCTGATCTTGAGTGTGTC  
ATCCTTCACTCACGGACAACCAGCAGATATATGGCCACGCTATGAAAAAT  
TCCGCAATCAGCATGTGATTCTGATATGACTGAAGATATGTGTACCAGA  
GTAATCAAAGCAGACGCATCAATGTAAATGGTCGTGAGTCAAACCTGT  
CAACTCCTTCATAGCAGCAAATGAACATCAAATTAATGAAGTTTGTGGCA  
GAGGAGGAACTCCACAGGGTGGGGACCTGTTTGAGAGCAACCAACGATTT  
TTTGTAGTCAAGTGTACATCAAGTGGTGGGATGTATTATCCAAACTGTCA  
ATATTCTGGGAGGAGTTACTAGTAAGATTGTGTTGCAGTGTGATAGAG

GCTGGCCTGTACATTATGTAAGGTAA

>*Rnase2e*

ATGGAGATTCATCAGTCTGCTGTGATTCTGCTGCTGATCTTGAGTGTTTC  
ATCCTTCACTCACGGACAACCAGCAGATATATGGCAACGCTATGTA AAAAT  
TCCTCAATCAGCATGTGGATCCATTTATGACTGTGAATGATTGTACCAGT  
AGAATCGAAAAACAGAGACATCACTGGA ACTAATGGTGCCTGCAAACCTGT  
CAACTCCTTCATAGTAGCAAATGCAGATA CAATTA AACAGTTTGTGGCA  
GAGGAGGAACTCGACTGAGGAATGATCGAAACCTGTTTGAGAGCGACCTA  
CGATTTTTTGTGGTCAAGTGTAAATAAAAA CAATTAAGAATGGAAAGTG  
TGAATATGTAGGGAAGGGTTACTAGAAA GATTGTGTTGGCTTGTGATA  
AAGGCTGGCCTGTACATTATGAAAGGTAA

>*Rnase2f*

ATGGAGATTCATCAGTCTGCTGTGATTCTGCTGCTGATCTTGAGTGTTTC  
ATCCTTCACTCACGGACAACCAGCAGATGTAAGGCGACGCTATGAAAAAT  
TCCTCAATCAGCATGTGGATCCATTTATGACTGTGAATGATTGTACCAGT  
AAAATCGAAAAACAGAGATATCACTGCAACTGATGGT GACTGCAAACCTGT  
CAACTCCTTCATAGTAGCAAATGAAGATA CAATTA AAGCAATTTGTGGCA  
GAGGAGGAACTCGACTGAGGAATGATCAAAACTTGT TTGAGAGCAACCTA  
CCATTTTTTGTGGTCAAGTGTACAATAAAAACTAGTAAGTTTACTACTAA  
ACTAACTAAGGGA ACTCCAAAGTGTGAATATGTAGGGAAGGGTTACTACTA  
GTAAGATTGTGTTGGCTTGTGATAGAGGCTGGCCTGTACATTATGAAAGG  
TAA

>*Rnase3a*

ATGAAGATCCATCAGTCTACTGTGATTCTGCTGCTGGTTATATGTGCACC  
ATTGTCCACTTACAGCCAGAGTTATGGGGCTTTCAAAAACAAACATGTGG  
GTCCACTCAACATGGCTGGACGGGATTGTACCGCTGTGATCGAAAATAGA  
CGCATCAATAAAAAAACTGTAAATGCAAAAAAATAAACACCTTCATAAT  
GGCAACTGAACAGCAAATTAAGATGTTTGTAAAGACAGGAAAAAGGCAAG  
CGGATGGAAAGACCTTCATAAGCAATACTGTTTTTGATGTGATTGATTGT  
ACTCTTAAAACAGAAGATAACAACGGTTGTAAATATAAGGATGATGTTAA  
ACCAAAAACAAACACAATTACTTTGACATGTGAAAATGGTCTCCCAGTAC  
ATTATGGTGAAGCAAAAATAG

>*Rnase3b*

ATGAAGATCCATCAGTCTACCGTGATTCTGCTGCTGGTTATATGTGCACC  
ATTGTCCACTTACAGCCAGAGTTATGAGGCTTTCAATAACAAACATGTGG  
GTCCAAACAAGATGACTGGACGGGATTGTACCGCTGTGATCGAAAATAGA  
CTCATCAATGAAAACCGCGAATGCAAACAATAAACACCTTCATAATGGC  
AACTGAAGATGAAATTAAGCCGTTTGTAAAGGATGGAAAAAAGCAAGCGG  
ATGGAAAGACCTTCATAAGCAATACTGAATTTGATGTGATTGATTGTACT  
CTTAAAAGAAAAGATAACAACGGTTGTAAATATAAGGATGATGTTAAACC  
AAAAAAAACCAATTACTTTGACATGTGAAAATGGTCTCCCAGTACATT  
ATGGTGAAGCAAAAATAG

>*Rnase3c*

ATGAAGATCCATCAGTCTACTGTGATTCTGCTGCTGGTTATATGTGCACC

ATTGTCCACTTACAGCCAGAGTTATGAGTTTCAAAAAAAAAACATCTGGCTC  
CAAACGGGATCACTGACAATGATTGTACCACCGAGATCAAAAATAGACAA  
ATCAATAAGTGCAGAAAAATACACACCTTCATAAAAGCAAATGAAAATGA  
AATTATACATGTTTGTGATAATGAAAAAAGCATCAGAATTTGCCCTATA  
TGATAAGTGCTACATTTAATGTGATTGATTGTGCTGGCAAAGAAGATAAC  
AACGGTTGTAATTATACTCATGTTGAACCAAATAGAAAAACATTTATATT  
GACATGTGAAAAAGGTTTCCCAGTACATTATGGCGAATCCACCTTAAAGT  
AG

**Figure S1.** Nucleotide sequences of *Megalobrama amblycephala* *Rnase2a*, *Rnase2b*, *Rnase2c*, *Rnase2d*, *Rnase2e*, *Rnase2f*, *Rnase3a*, *Rnase3b* and *Rnase3c*.

Rnase1

Rnase2a

Rnase2b

Rnase2c

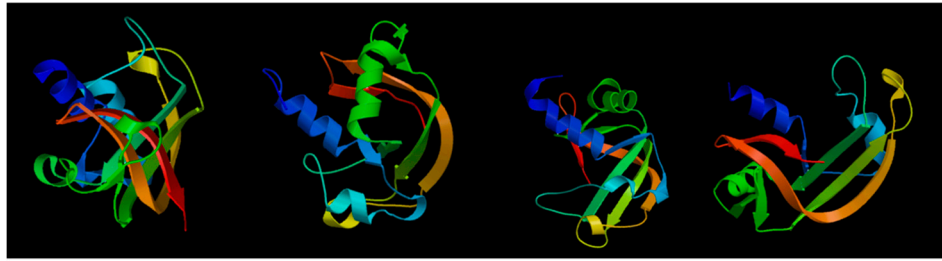

Rnase2d

Rnase2e

Rnase2f

Rnase3a

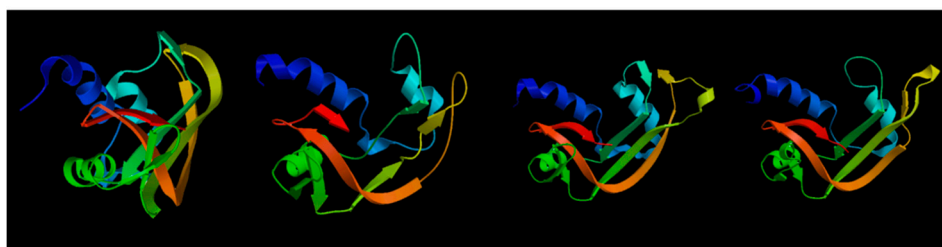

Rnase3b

Rnase3c

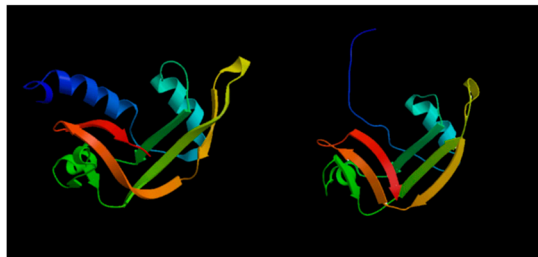

**Figure S2.** The 3D protein structure prediction for *M. amblycephala* Rnase1, Rnase2a, Rnase2b, Rnase2c, Rnase2d, Rnase2e, Rnase2f, Rnase3a, Rnase3b and Rnase3c modeled using the SWISS-MODEL automatic protein modeling server ProMod3 program. The light blue, blue and green ribbons represent the three  $\alpha$ -helices and ribbons with other colors representing the six  $\beta$ -strands.

**Table S1.** Number of basic amino acids of Rnase1 to Rnase3 in fish Rnases, as well as *Homo sapiens* and *Bos taurus* Rnases known to be bactericidal.

| Protein            | Number of lysines | Number of arginines | Total |
|--------------------|-------------------|---------------------|-------|
| <i>Ma</i> -Rnase1  | 3                 | 17                  | 20    |
| <i>Ma</i> -Rnase2a | 11                | 6                   | 17    |
| <i>Ma</i> -Rnase2b | 10                | 7                   | 17    |
| <i>Ma</i> -Rnase2c | 14                | 6                   | 20    |
| <i>Ma</i> -Rnase2d | 5                 | 11                  | 16    |
| <i>Ma</i> -Rnase2e | 10                | 10                  | 20    |
| <i>Ma</i> -Rnase2f | 12                | 9                   | 21    |
| <i>Ma</i> -Rnase3a | 17                | 4                   | 21    |
| <i>Ma</i> -Rnase3b | 16                | 4                   | 20    |
| <i>Ma</i> -Rnase3c | 12                | 3                   | 15    |
| <i>Dr</i> -Rnase1  | 4                 | 15                  | 19    |
| <i>Dr</i> -Rnase2  | 12                | 10                  | 22    |
| <i>Dr</i> -Rnase3  | 15                | 5                   | 20    |
| <i>Ol</i> -Rnase1  | 7                 | 11                  | 18    |
| <i>Ol</i> -Rnase2  | 9                 | 7                   | 16    |
| <i>Ol</i> -Rnase3  | 14                | 7                   | 21    |
| <i>Om</i> -Rnase1  | 11                | 8                   | 19    |
| <i>Om</i> -Rnase2  | 11                | 5                   | 16    |
| <i>Ss</i> -Rnase1  | 7                 | 10                  | 17    |
| <i>Ss</i> -Rnase2  | 13                | 2                   | 15    |
| <i>Hs</i> -Rnase1  | 8                 | 10                  | 18    |
| <i>Hs</i> -Rnase2  | 4                 | 8                   | 12    |
| <i>Hs</i> -Rnase3  | 1                 | 19                  | 20    |
| <i>Bt</i> -Rnase1  | 10                | 4                   | 14    |
| <i>Bt</i> -Rnase2  | 3                 | 12                  | 15    |
| <i>Bt</i> -Rnase3  | 3                 | 12                  | 15    |

*Ma*: *Megalobrama amblycephala*, *Dr*: *Danio rerio*, *Ol*: *Oryzias latipes*, *Om*: *Oncorhynchus mykiss*, *Ss*: *Salmo salar*, *Hs*: *Homo sapiens*, *Bt*: *Bos taurus*.

**Table S2.** The Cycle threshold (Ct) values of *Rnase2a*, *Rnase2d*, *Rnase2f*, *Rnase3b*, *Rnase3c* and  $\beta$ -*actin* at different stages of development and growth. There are three replicates per each sample: hpf = hours post fertilization.

| early developmental stages | $\beta$ - <i>actin</i> | <i>Rnase2a</i> | <i>Rnase2d</i> | <i>Rnase2f</i> | <i>Rnase3b</i> | <i>Rnase3c</i> |
|----------------------------|------------------------|----------------|----------------|----------------|----------------|----------------|
| 0hpf 1                     | 24.83                  | 36.6           | 34.65          | 31.82          | 35.59          | 31.55          |
| 0hpf 2                     | 25.87                  | 36.92          | 34.31          | 32.61          | 35.47          | 31.71          |
| 0hpf 3                     | 25.39                  | 36.3           | 34.5           | 31.91          | 35.73          | 30.96          |
| 16hpf 1                    | 24.37                  | 32.79          | 32.83          | 32.09          | 37.53          | 33.64          |
| 16hpf 2                    | 23.77                  | 33.1           | 33.2           | 31.6           | 37.55          | 33.65          |
| 16hpf 3                    | 24.4                   | 33.52          | 34.53          | 31.23          | 37.64          | 33.66          |
| 38hpf 1                    | 21.89                  | 33.8           | 32.35          | 31.87          | 36.53          | 33.5           |
| 38hpf 2                    | 22.33                  | 33.93          | 32.55          | 32.59          | 37.98          | 32.69          |
| 38hpf 3                    | 21.48                  | 33.83          | 32.25          | 30.71          | 36.64          | 34.25          |
| 48hpf1                     | 17.69                  | 33.43          | 30.71          | 30.39          | 32.57          | 33.3           |
| 48hpf 2                    | 17.74                  | 33.63          | 30.25          | 30.74          | 33.75          | 32.36          |
| 48hpf 3                    | 18.35                  | 33.95          | 30.54          | 30.88          | 33.96          | 34.3           |
| 88hpf 1                    | 20.73                  | 31.67          | 32.43          | 31.31          | 35.4           | 33.65          |
| 88hpf 2                    | 20.83                  | 31.68          | 31.85          | 32.69          | 34.5           | 33.63          |
| 88hpf 3                    | 20.85                  | 31.69          | 32.14          | 31.98          | 35.6           | 33.7           |
| 120hpf 1                   | 17.23                  | 32.86          | 30.25          | 30.39          | 35.44          | 34.61          |
| 120hpf 2                   | 17.4                   | 32.64          | 30.46          | 30.45          | 35.65          | 33.57          |
| 120hpf 3                   | 17.81                  | 32.42          | 30.33          | 30.37          | 35.55          | 33.81          |
| 140hpf 1                   | 19.22                  | 32.2           | 30.57          | 31.31          | 34.88          | 33.85          |
| 140hpf 2                   | 18.84                  | 33.27          | 30.02          | 31.27          | 34.78          | 34.56          |
| 140hpf 3                   | 18.68                  | 34.48          | 30.57          | 31.32          | 35.6           | 33.23          |

  

| one-year-old tissues | $\beta$ - <i>actin</i> | <i>Rnase2a</i> | <i>Rnase2d</i> | <i>Rnase2f</i> | <i>Rnase3b</i> | <i>Rnase3c</i> |
|----------------------|------------------------|----------------|----------------|----------------|----------------|----------------|
| heart 1              | 18.20                  | 31.56          | 30.97          | 30.67          | 33.82          | 32.67          |
| heart 2              | 17.79                  | 31.87          | 31.73          | 30.98          | 33.8           | 32.75          |
| heart 3              | 17.94                  | 31.75          | 30.86          | 30.74          | 33.18          | 32.29          |
| liver 1              | 19.42                  | 30.54          | 30.65          | 36.02          | 34.18          | 34.52          |
| liver 2              | 18.64                  | 30.51          | 30.35          | 36             | 33.77          | 34.61          |
| liver 3              | 18.41                  | 30.20          | 31.34          | 36.17          | 34.81          | 34.95          |
| spleen 1             | 14.95                  | 30.58          | 30.89          | 32.33          | 30.99          | 31.5           |
| spleen 2             | 15.43                  | 30.40          | 31.68          | 32.76          | 30.72          | 31.42          |
| spleen 3             | 14.89                  | 30.15          | 31.87          | 32.9           | 30.75          | 31.62          |
| kidney 1             | 15.29                  | 33.40          | 30.82          | 30.77          | 32.55          | 30.65          |

|          |       |       |       |       |       |       |
|----------|-------|-------|-------|-------|-------|-------|
| kidney 2 | 15.52 | 33.69 | 30.60 | 30.64 | 32.79 | 30.83 |
| kidney 3 | 15.54 | 33.74 | 30.28 | 30.88 | 32.97 | 30.41 |
| brain 1  | 16.55 | 30.32 | 30.60 | 33.23 | 35.91 | 32.26 |
| brain 2  | 16.47 | 30.53 | 31.37 | 33.75 | 34.91 | 31.95 |
| brain 3  | 16.60 | 30.49 | 31.61 | 33.72 | 34.55 | 31.67 |
| gut 1    | 18.61 | 30.23 | 30.54 | 32.91 | 34.06 | 30.87 |
| gut 2    | 19.67 | 30.35 | 31.25 | 32    | 34.74 | 30.96 |
| gut 3    | 18.61 | 30.91 | 30.30 | 32.68 | 34.99 | 30.67 |
| muscle 1 | 18.93 | 30.34 | 32.61 | 33.49 | 32.35 | 33.59 |
| muscle 2 | 18.98 | 30.29 | 31.77 | 33.19 | 31.85 | 33.92 |
| muscle 3 | 17.56 | 29.91 | 31.58 | 32.83 | 31.67 | 33.42 |
| testis 1 | 20.41 | 30.40 | 30.07 | 31.91 | 30.21 | 31.22 |
| testis 2 | 20.24 | 30.67 | 30.52 | 31.85 | 30.76 | 31.97 |
| testis 3 | 20.69 | 30.38 | 30.57 | 31.4  | 30.47 | 31.53 |

| two-year-old tissues | <i>β-actin</i> | <i>Rnase2a</i> | <i>Rnase2d</i> | <i>Rnase2f</i> | <i>Rnase3b</i> | <i>Rnase3c</i> |
|----------------------|----------------|----------------|----------------|----------------|----------------|----------------|
| heart 1              | 18.64          | 35.54          | 30.99          | 36.27          | 34.65          | 31.99          |
| heart 2              | 19.97          | 35.23          | 30.31          | 37.94          | 36.75          | 32.66          |
| heart 3              | 19.32          | 35.6           | 30.48          | 37.56          | 35.74          | 32.39          |
| liver 1              | 19.94          | 34.95          | 33.43          | 30.62          | 36.71          | 31.67          |
| liver 2              | 18.83          | 34.8           | 33.35          | 29.52          | 36.63          | 31.43          |
| liver 3              | 19.26          | 34.62          | 33.25          | 30.46          | 36.71          | 31.52          |
| spleen 1             | 17.74          | 34.44          | 33.8           | 31.07          | 34.99          | 31.23          |
| spleen 2             | 17.56          | 34.21          | 34.47          | 30.90          | 34.93          | 31.9           |
| spleen 3             | 17.66          | 34.53          | 34.38          | 30.55          | 34.36          | 31.81          |
| kidney 1             | 17.95          | 33.76          | 31.93          | 34.66          | 33.55          | 30.62          |
| kidney 2             | 18.34          | 33.82          | 31.34          | 33.38          | 33.21          | 30.98          |
| kidney 3             | 16.98          | 33.52          | 31.42          | 34.68          | 33.82          | 30.82          |
| brain 1              | 17.30          | 30.47          | 32.28          | 34.74          | 35.59          | 31.71          |
| brain 2              | 17.53          | 30.48          | 32.22          | 34.76          | 35.65          | 31.88          |
| brain 3              | 16.98          | 30.94          | 32.59          | 34.5           | 35.47          | 31.68          |
| gut 1                | 17.63          | 30.92          | 32.8           | 31.26          | 36.42          | 32.62          |
| gut 2                | 18.41          | 30.83          | 32.7           | 31.64          | 36.95          | 32.3           |
| gut 3                | 18.42          | 30.39          | 32.61          | 32.99          | 36.64          | 32.88          |
| muscle 1             | 18.35          | 33.47          | 32.84          | 30.62          | 35.77          | 33.47          |
| muscle 2             | 18.25          | 33.65          | 32.48          | 30.24          | 35.43          | 33.35          |
| muscle 3             | 17.68          | 33.17          | 32.48          | 31.4           | 34.8           | 33.19          |

|          |       |       |       |       |       |       |
|----------|-------|-------|-------|-------|-------|-------|
| testis 1 | 17.55 | 33.95 | 30.15 | 30.38 | 30.53 | 31.44 |
| testis 2 | 18.63 | 34.24 | 30.82 | 31.57 | 30.7  | 31.54 |
| testis 3 | 18.82 | 34.66 | 30.82 | 30.56 | 30.95 | 31.64 |

---
